# Supplementary material
Source: PubMed Central journal article supplement (PMC2492654)
Supplement: pp.108.120493_6.pdf [file pp.108.120493_6.pdf]

**Table SI** PCA loadings of NMR spectral data obtained for latex chloroform extracts. Bin numbers are shown with their corresponding ppm range and value along respective axes PC1 and PC2 (see Fig. 2). Bins containing thebaine proton shifts within their ppm range are indicated. Only thebaine could be identified in chloroform extracts.

| <b>Bin</b> | <b>Range (ppm)</b> | <b>PC1</b> | <b>PC2</b> | <b>Metabolite(s)</b> |
|------------|--------------------|------------|------------|----------------------|
| 0          | 0.00-0.04          | -0.13929   | -0.16282   | Artifact             |
| 21         | 0.84-0.88          | -0.13502   | 0.138864   | Unknown              |
| 22         | 0.88-0.92          | -0.17994   | 0.129621   | Unknown              |
| 31         | 1.24-1.28          | -0.19089   | 0.213886   | Unknown              |
| 32         | 1.28-1.32          | -0.21254   | 0.16365    | Unknown              |
| 33         | 1.32-1.36          | -0.15586   | 0.068852   | Unknown              |
| 40         | 1.60-1.64          | -0.16788   | 0.12296    | Unknown              |
| 41         | 1.64-1.68          | -0.1548    | 0.146542   | Unknown              |
| 50         | 2.00-2.04          | -0.15073   | 0.134574   | Unknown              |
| 51         | 2.04-2.08          | -0.16735   | 0.083922   | Unknown              |
| 60         | 2.40-2.44          | -0.04608   | -0.15577   | Unknown              |
| 63         | 2.52-2.56          | -0.08357   | -0.2008    | Unknown              |
| 64         | 2.56-2.60          | -0.08775   | -0.2152    | Unknown              |
| 70         | 2.80-2.84          | 0.181191   | 0.023108   | Thebaine             |
| 76         | 3.04-3.08          | 0.134045   | 0.026156   | Thebaine             |
| 90         | 3.60-3.64          | 0.298876   | 0.054406   | Thebaine             |
| 96         | 3.84-3.88          | 0.198365   | -0.25319   | Thebaine             |
| 99         | 3.96-4.00          | -0.07677   | -0.15499   | Unknown              |
| 101        | 4.04-4.08          | -0.08921   | -0.20423   | Unknown              |
| 102        | 4.08-4.12          | -0.0933    | -0.21705   | Unknown              |
| 126        | 5.04-5.08          | 0.165003   | 0.030837   | Thebaine             |
| 133        | 5.32-5.36          | 0.133387   | 0.091371   | Thebaine             |
| 148        | 5.92-5.96          | -0.10857   | -0.24234   | Unknown              |
| 166        | 6.64-6.68          | 0.138753   | 0.021886   | Thebaine             |
| 167        | 6.68-6.72          | 0.167484   | 0.023937   | Thebaine             |
| 174        | 6.96-7.00          | -0.0763    | -0.17467   | Unknown              |
| 181        | 7.24-7.28          | 0.168345   | -0.02442   | Unknown              |
