# Supplementary material
Source: PubMed Central journal article supplement (PMC2492654)
Supplement: pp.108.120493_7.pdf [file pp.108.120493_7.pdf]

**Table SII** List of metabolites for which one-dimensional  $^1\text{H}$  NMR signatures are available in a Chenomx NMR Suite compound database customized for opium poppy. An asterisk denotes a metabolite not present in the standard Chenomx library, but added to the customized database.

|     |                                |     |                                       |
|-----|--------------------------------|-----|---------------------------------------|
| 1.  | Acetaldehyde                   | 36. | <i>N</i> -Carbamoylaspartate          |
| 2.  | Acetamide                      | 37. | <i>N</i> -Carbamoyl- $\beta$ -alanine |
| 3.  | Acetate                        | 38. | Cholate                               |
| 4.  | Acetoacetate                   | 39. | Choline                               |
| 5.  | Acetone                        | 40. | Cinnamate *                           |
| 6.  | <i>N</i> -Acetylaspartate      | 41. | Citrate                               |
| 7.  | <i>N</i> -Acetylglutamate      | 42. | Citrulline                            |
| 8.  | Acetylsalicylate               | 43. | Codeine *                             |
| 9.  | <i>N</i> -Acetyltyrosine       | 44. | Coumarate *                           |
| 10. | <i>cis</i> -Aconitate          | 45. | Cysteine                              |
| 11. | <i>trans</i> -Aconitate        | 46. | Cystine                               |
| 12. | Adenine                        | 47. | Cytosine                              |
| 13. | Adenosine                      | 48. | 2'-Deoxyadenosine                     |
| 14. | Adenosine diphosphate *        | 49. | 2'-Deoxyguanosine                     |
| 15. | Adenosine triphosphate *       | 50. | 2'-Deoxyinosine                       |
| 16. | <i>S</i> -Adenosylhomocysteine | 51. | 1,3-Dihydroxyacetone                  |
| 17. | <i>S</i> -Adenosylmethionine * | 52. | 5,6-Dihydrothymine                    |
| 18. | Alanine                        | 53. | 5,6-Dihydrouracil                     |
| 19. | $\beta$ -Alanine               | 54. | Dihydroxyacetone phosphate *          |
| 20. | Alloisoleucine                 | 55. | Dimethylamine                         |
| 21. | 2-Aminobutyrate                | 56. | <i>N,N</i> -Dimethylformamide         |
| 22. | 4-Aminobutyrate                | 57. | <i>N,N</i> -Dimethylglycine           |
| 23. | 3-Aminoisobutyrate             | 58. | 1,7-Dimethylxanthine                  |
| 24. | Anserine                       | 59. | L-DOPA *                              |
| 25. | Arginine                       | 60. | Dopamine *                            |
| 26. | Asparagine                     | 61. | Erythrose-4-phosphate *               |
| 27. | Aspartate                      | 62. | Ethanol                               |
| 28. | Benzoate                       | 63. | Ethanolamine                          |
| 29. | Betaine                        | 64. | Ethylene glycol                       |
| 30. | Biotin                         | 65. | Ethylmalonate                         |
| 31. | Butanone                       | 66. | Ferulate                              |
| 32. | Butyrate                       | 67. | Formate                               |
| 33. | Caffeate *                     | 68. | Fructose                              |
| 34. | Caprate                        | 69. | Fructose-1,6-bisphosphate *           |
| 35. | Caprylate                      | 70. | Fructose-6-phosphate *                |

71. Fucose
72. Fumarate
73. 2-Furoate
74. Galactarate
75. Galactonate
76. Galactose
77. Glucarate
78. Glucitol
79. Gluconate
80. Glucose
81. Glucose-6-phosphate \*
82. Glutamate
83. Glutamine
84.  $\gamma$ -Glutamylphenylalanine
85. Glutarate
86. Glutaric acid monomethyl ester
87. Glutathione
88. Glycerate
89. Glycerol
90. Glycine
91. Glycolate
92. Glycylproline
93. Guanidoacetate
94. Histadine
95. Homocitrulline
96. Homocysteine
97. Homoserine
98. Homovanillate
99. *trans*-4-Hydroxy-L-proline
100. 4-Hydroxybenzoate
101. 2-Hydroxybutyrate
102. 3-Hydroxybutyrate
103. 4-Hydroxybutyrate
104. 2-Hydroxyglutarate
105. 3-Hydroxyisovalerate
106. 5-Hydroxyindole-3-acetate
107. 5-Hydroxylysine
108. 3-Hydroxy-3-methylglutarate
109. 4-Hydroxy-3-methoxymandelate
110. 2-Hydroxy-3-methylvalerate
111. 3-Hydroxyphenylacetate
112. 4-Hydroxyphenylacetate
113. 2-Hydroxyvalerate
114. Hypoxanthine
115. Imidazole
116. Indole-3-acetate
117. Inosine
118. *myo*-Inositol
119. Isobutyrate
120. Isocaproate
121. Isocitrate
122. Isoeugenol
123. Isoleucine
124. Isopropanol
125. Isovalerate
126. *N*-Isovaleroylglycine
127. Lactate
128. Lactose
129. Leucine
130. Lysine
131. Malate
132. Maleate
133. Malonate
134. Mannitol
135. Mannose
136. Methanol
137. Methionine
138. Methylamine
139. 2-Methylglutarate
140. 3-Methylglutarate
141. Methylguanidine
142.  $\pi$ -Methylhistadine
143.  $\tau$ -Methylhistadine
144. Methylmalonate
145. 3-Methyl-2-oxovalerate
146. 3-Methylxanthine
147. 5-Methoxysalicylate
148. Methylsuccinate
149. Morphine \*
150. NAD<sup>+</sup>
151. Noscapine \*
152. Ornithine
153. Oxaloacetate
154. 2-Oxobutyrate
155. 2-Oxoglutarate
156. 2-Oxovalerate

157. Panthothenate  
158. Papaverine  
159. Phenol  
160. Phenylacetate  
161. Phenylacetyl glycine  
162. Phenylalanine  
163. 3-Phenylpropionate  
164. *O*-Phosphocholine  
165. Phosphoenolpyruvate \*  
166. *O*-Phosphoethanolamine  
167. 6-Phosphogluconic acid \*  
168. 2-Phosphoglycerate  
169. 2-Phenylpropionate  
170. 3-Phosphoserine \*  
171. *O*-Phosphoserine  
172. Phthalate  
173. Proline  
174. Propionate  
175. Propylene glycol  
176. Pyridoxine  
177. 4-Pyroxidate  
178. Pyruvate  
179. Quinolate  
180. *S*-Reticuline \*  
181. Riboflavin  
182. Ribose  
183. Ribose-5-phosphate \*  
184. Salicylate  
185. Sanguinarine \*  
186. Serine  
187. Shikimate \*  
188. Stylopine \*  
189. Suberate  
190. Succinate  
191. Succinylacetone  
192. Sucrose  
193. *S*-Sulfocysteine  
194. Tartrate  
195. Tetrahydrofolic acid \*  
196. Thebaine \*  
197. Threonate  
198. Threonine  
199. Thymine  
200. Trimethylamine  
201. Trimethylamine-*N*-oxide  
202. Tryptophan  
203. Tyramine \*  
204. Tyrosine  
205. Uracil  
206. Uridine  
207. Valerate  
208. Valine  
209. Vanillate  
210. Xanthine  
211. Xanthosine  
212. Xylose
