# Supplementary material
Source: PubMed Central journal article supplement (PMC2492654)
Supplement: pp.108.120493_8.pdf [file pp.108.120493_8.pdf]

**Table SIV** Primers used for real-time (RT)-PCR gene expression analysis in opium poppy.

| <b>Gene</b>                                  | <b>Forward primer<br/>5' – 3'</b> | <b>Reverse primer<br/>5' – 3'</b> |
|----------------------------------------------|-----------------------------------|-----------------------------------|
| Sucrose synthase                             | TGTGGCCTTACTTGGAGCAAT             | TCAGTTCGCAGCAAGTTCTT              |
| Glucose-6-phosphate<br>dehydrogenase         | CCTGTCTGCAGAATGATCAGGTT           | TCGTGTCCATCCACCAAAATC             |
| Phosphoglucose<br>isomerase                  | GGAGAAAAGGTCCCTCAGCAT             | GATGGACGGTTGCCAGAGA               |
| Phosphoglyconate<br>dehydrogenase            | TACGGTTTCCATGATCCTGAATC           | CACAACACGAGGCTTCTGGAT             |
| Transketolase                                | TCGAGCATTGGCAAGCTT                | CAGCGGGACGGAGCATAA                |
| Transaldolase                                | GACACCCTGTATGTTGCTCCTCTA          | GAGCTTGGTCTGGCATTGTTG             |
| Fructose biphosphate<br>aldolase             | CATTGACCGATGTGCTGATGT             | GTCGTTCAAAGCCTTG TAGCAA           |
| Glyceraldehyde-3-<br>phosphate dehydrogenase | CCCAGCACTTAATGGAAAATTGA           | AACATCGACGGTGGGAACA               |
| Phosphoglycerate kinase                      | TCGGAGCCGTGTCAAACC                | CCTTTGAACCACCAACAATGG             |
| Phosphoglycerate mutase                      | GCAGATAGATATGGAAAGGAGCAAGT        | GCCGTTAGGCGGAGGAGTAT              |
| Enolase                                      | CAGCCATCGCAGTGGAGAA               | CCCAACAGCAAGATCAGCAA              |
| DAHP synthase                                | TGGGTTCGGTGAGCGTACTAGA            | TGGCAACACCTCTCAAGAACTC            |
| Dehydroquinate synthase                      | CTGTTGATAAGAAGGTGGCTGATG          | ATTGCCGAGAGGACCTTTGA              |
| 3-Dehydroquinate<br>dehydratase              | TTGCACGATTCCTCACAAAGAA            | TGGCAATTGGATCAACCTCAT             |
| Shikimate kinase                             | TTCCAAAGAGAGAGGTGAAGCAT           | TCTGCAATATGTTCAAGGGAAACTC         |
| EPSP synthase                                | CACTTGCGCCCAGTTGATG               | ACAGCAAGAGTCATGGCAACAT            |
| Chorismate synthase                          | AAGATGATTGCTGCTATTGATGCT          | TCACAACCCCCCAACAG                 |
| GOGAT                                        | CCACGTATTTTCCGTGTGGAT             | TGGATCTTTGCCAAACTTGGT             |
| Glutamine synthase                           | GGTTGACCGGAAAGCATGA               | ATTAGCGACTCCCCATGAAAAG            |
| Arogenate dehydratase                        | TCATCCACAAGCTTTATCTCAGTGT         | AGCTTCACGGGCAACATTAAGA            |
| Arogenate dehydrogenase                      | TCGGAATTCGGGATCGTATG              | CCCAGCCATTTTTACCACTTTC            |

| <b>Gene</b>                          | <b>Forward primer<br/>5' – 3'</b> | <b>Reverse primer<br/>5' – 3'</b> |
|--------------------------------------|-----------------------------------|-----------------------------------|
| 3-Phosphoglycerate dehydrogenase     | GATTGGACGAGTCGGAAGCA              | GACACTCATGAAGCTGACGTTCA           |
| Phosphoserine aminotransferase       | CGCATTCTCCGACTGATCT               | CATCAAGGAAGCTACCAAAGAAAAG         |
| Glycine hydroxymethyltransferase     | TGCTCTTTTGCTTTGTGATATGG           | AATGGGTTGGCAGCTTCCT               |
| Methylene tetrahydrofolate reductase | AAAGGAAATCATCCAACCAACTG           | GCCTCATCCTTCCACACAACA             |
| Methionine synthase                  | CGCCCAATGAAGGGAATG                | TTTCTAACGAAGGACCAATTGAGA          |
| SAM synthetase                       | GCTTGGTTGAGACCTGATGGTAA           | ATGGCACCCCTTGTCGTTTTG             |
| Adenylate kinase                     | TGGGAAGCAGGGAGCTAAAA              | TCCAAGATGGAATCATCAATCG            |
| Adenosine kinase                     | GGGAGACCGAGGATGTTGAG              | CGACCTGATACCTTGGGCAAT             |
| Adenosyl homocysteinase              | TTCCCTGCTATCAATGTGAATGA           | GGCATCCGTAGAGGTTGTCAA             |
| TYDC2                                | AACAAAGCTACGGAGTCAAGACAA          | CGGCGACTGAGTGCAGATT               |
| NCS1                                 | CAGGCAATGGTGGAGTTGGT              | CCGTGGCACTGCACCTAGA               |
| 6OMT                                 | CAACAATGTCAAACCCATGTCTTT          | CGGAACAGACGGTCTTTCGTT             |
| CNMT                                 | CCAACATGGAAGCAACATGAAA            | GTCCAACGTTGTTGATTCATCAG           |
| CYP80B3                              | GGAACGACTTCGAGTTGATACCA           | CAAGGGCACACCAGGACATA              |
| 4'OMT                                | TGCAGAGGATTGGGAAAATTTG            | ATAGCGCGAATCGGTCTGA               |
| 7OMT                                 | GCAGGTTTTCTCGTTACAATGT            | GAAAGGCCTCGATGATGCAA              |
| BBE                                  | TCAACCGATACAAATTCCGACTACT         | CATTACAATAAACGACGGTTTCGA          |
| TNMT                                 | GCTGTTTCATGAAGAACTATCAACTTG       | GCCTCAAAAAAGTGAGCAAATGT           |
| SalR                                 | TGATAAGTGACATTGGAGAGGATTCA        | TTGGGCTTCTGGTTTTTCGT              |
| SalAT                                | TCCGCGAGTGTCCCTAAGG               | TTCCACCACAGTCAAACATGTTC           |
| COR1                                 | TGGGCAGCCATGGAAGA                 | CAGACCCCGATTGCCCTAGT              |
