# Supplementary material
Source: PubMed Central journal article supplement (PMC2492654)

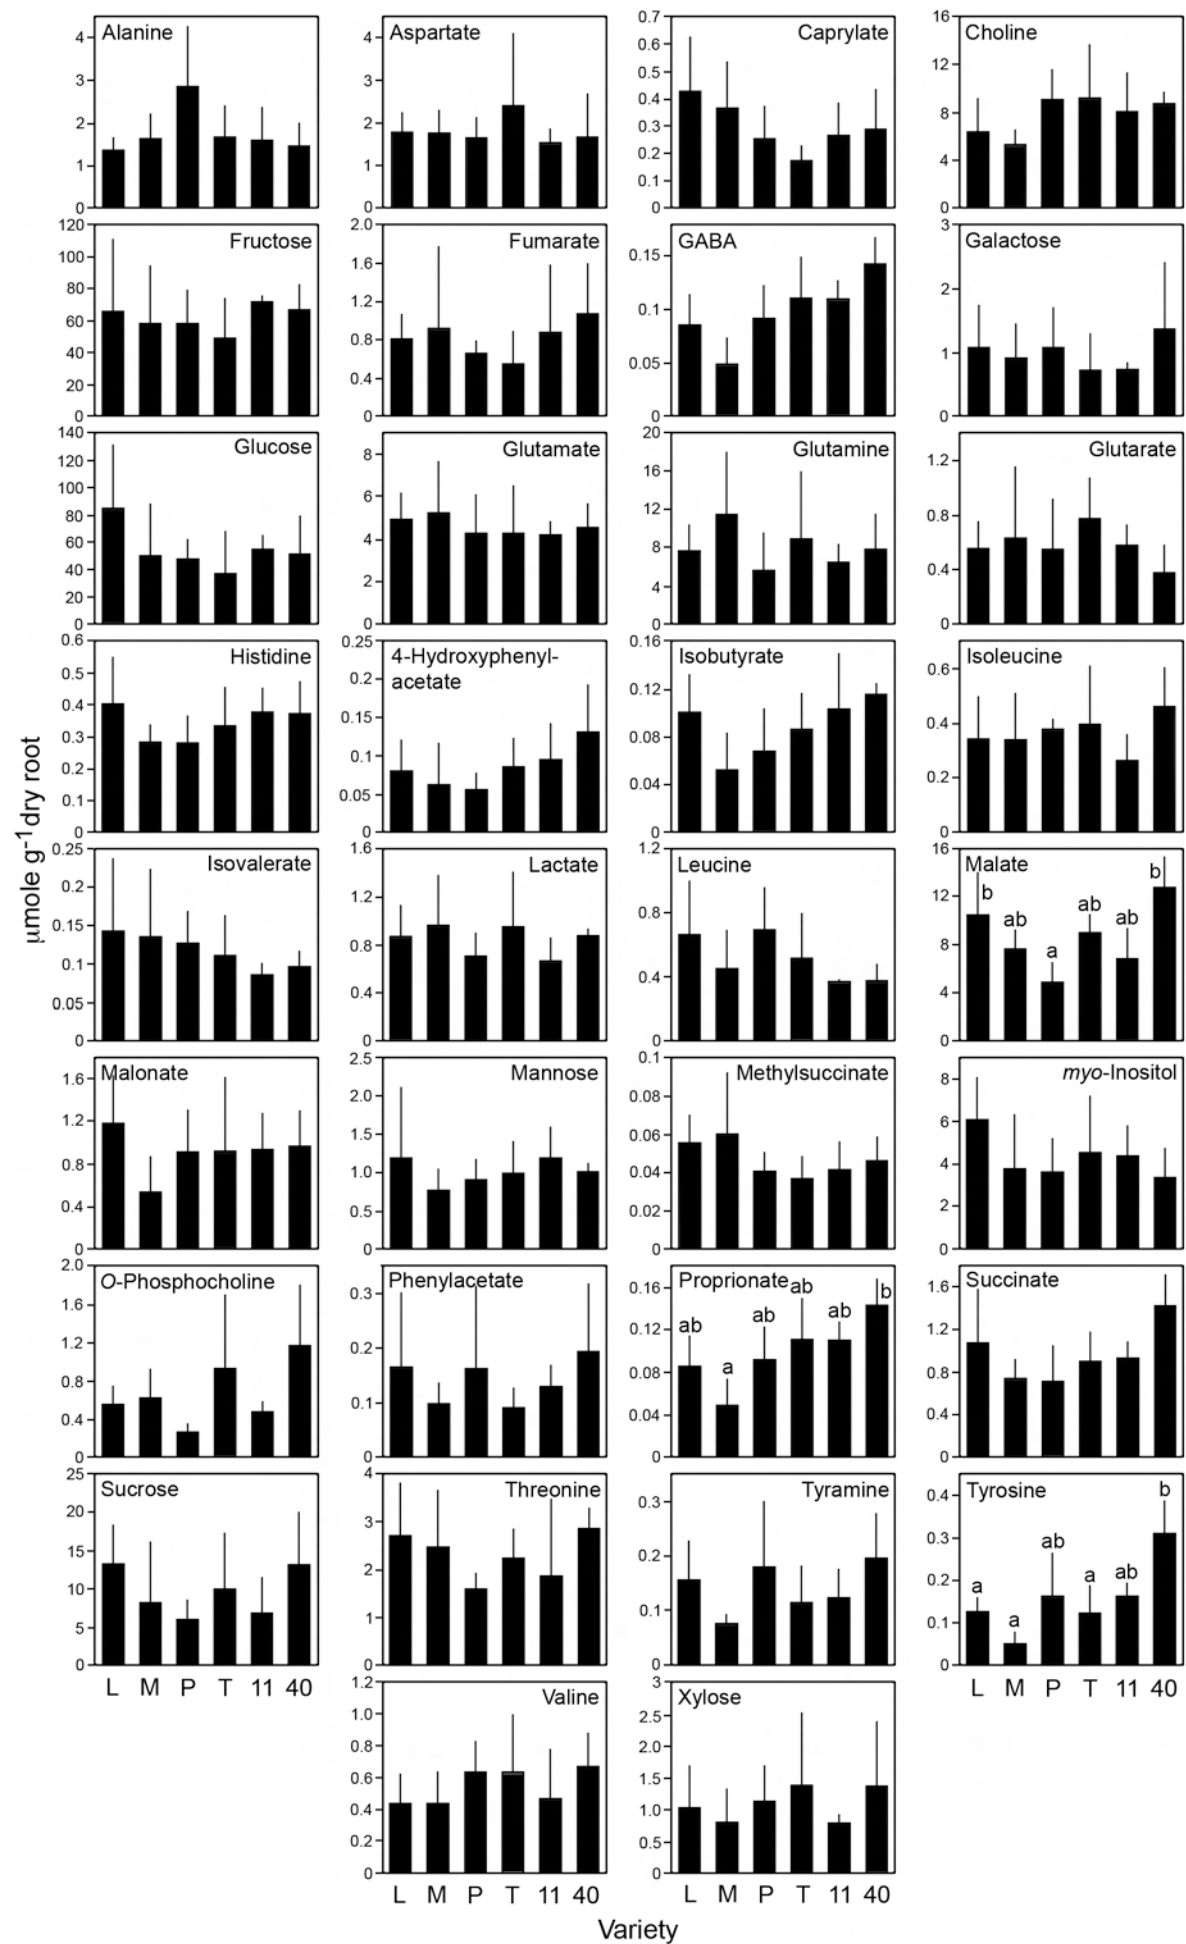

Supplement: pp.108.120493_1.pdf [file pp.108.120493_1.pdf]

### Latex

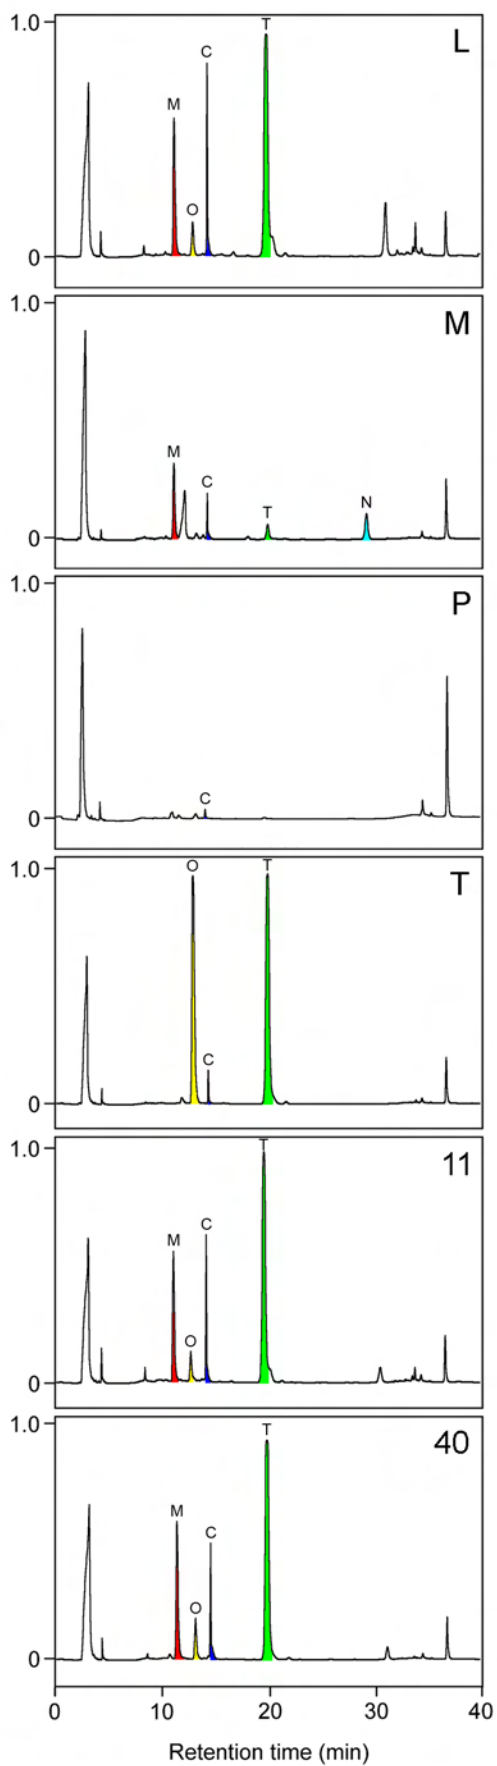

### Root

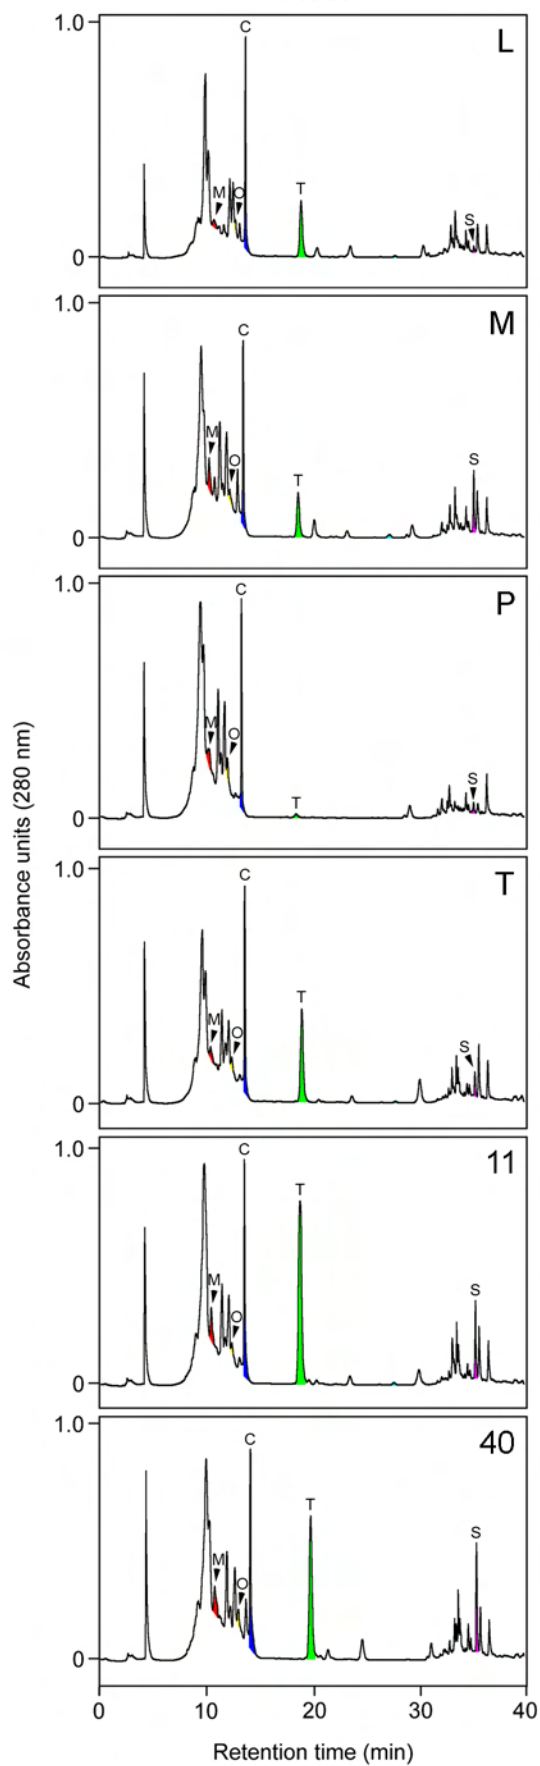

Supplement: pp.108.120493_2.pdf [file pp.108.120493_2.pdf]

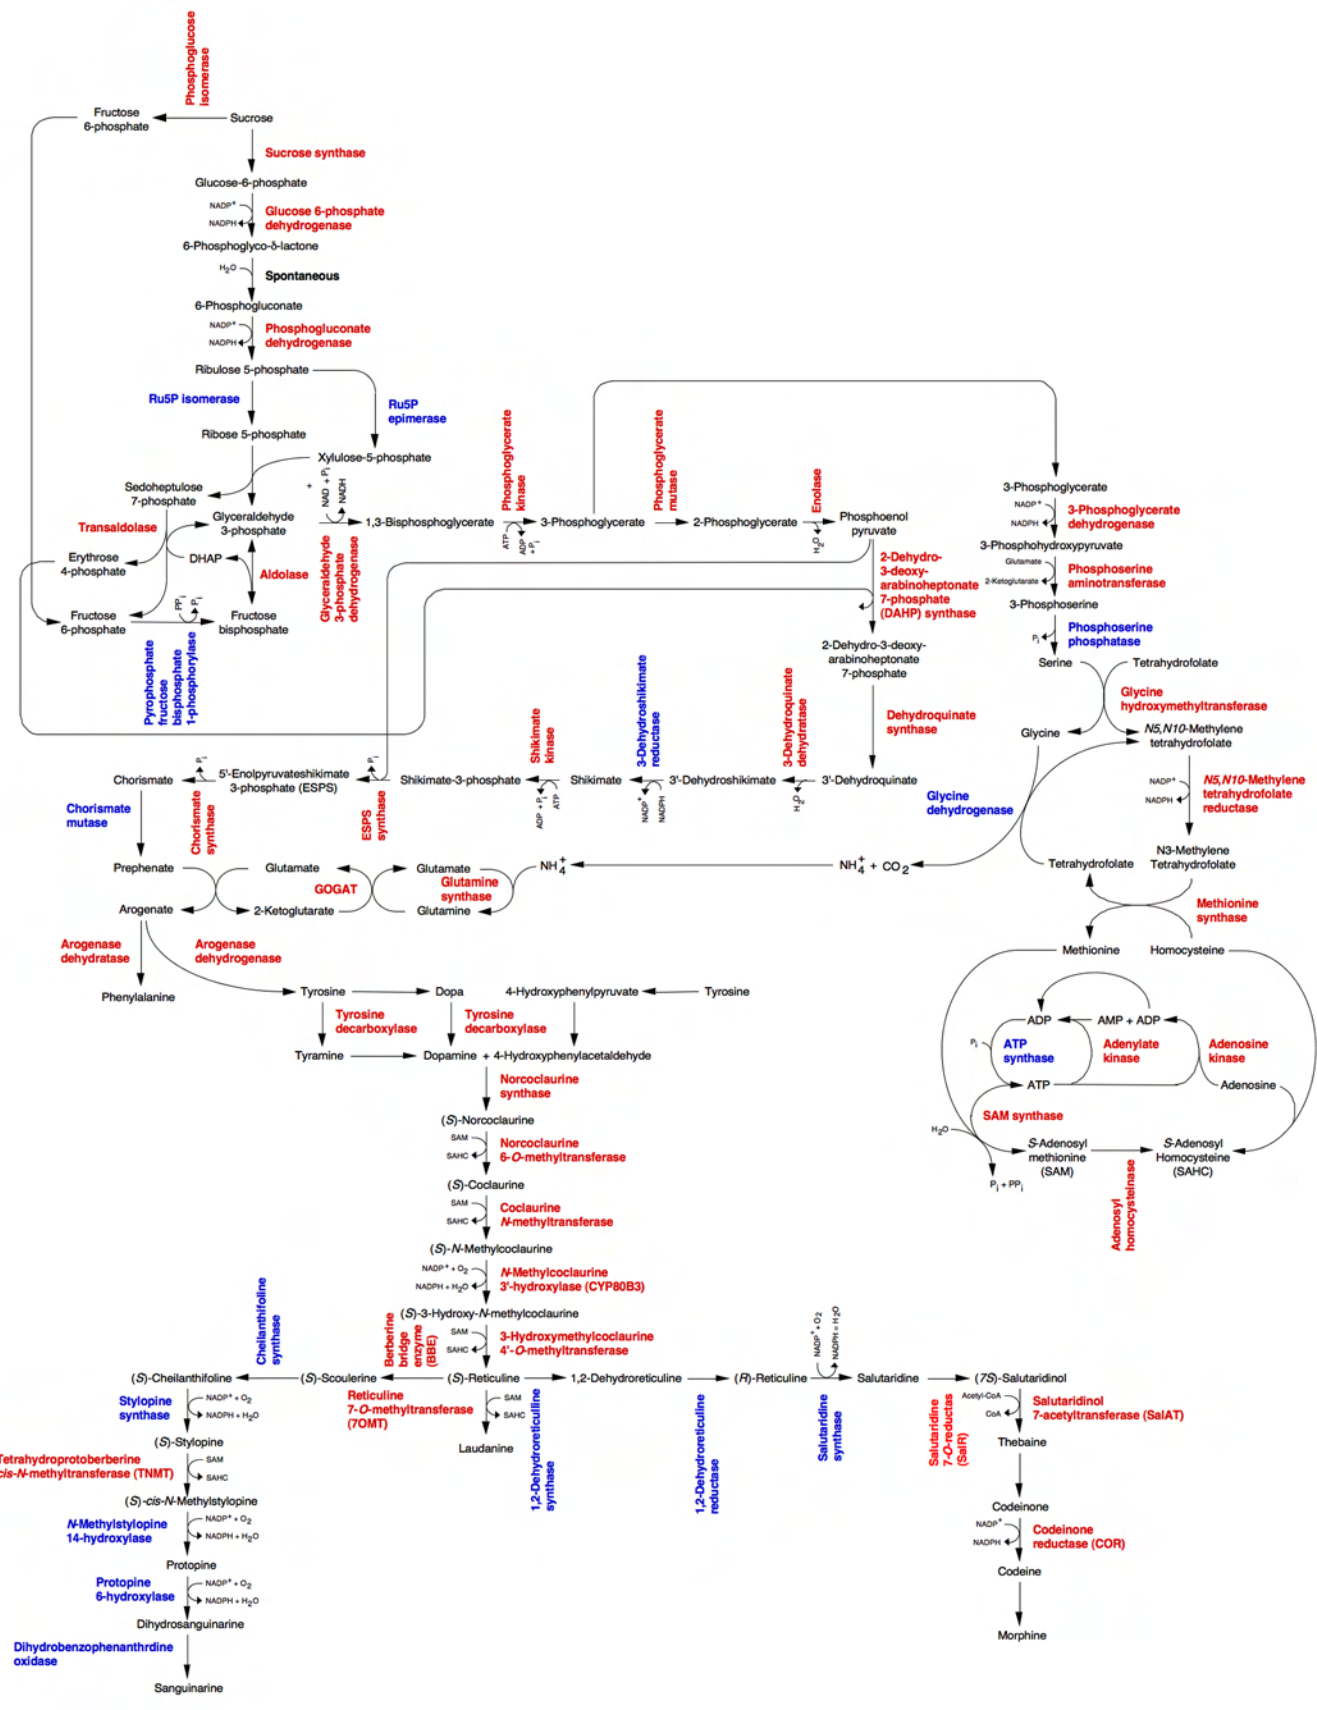

Supplement: pp.108.120493_3.pdf [file pp.108.120493_3.pdf]

Relative abundance

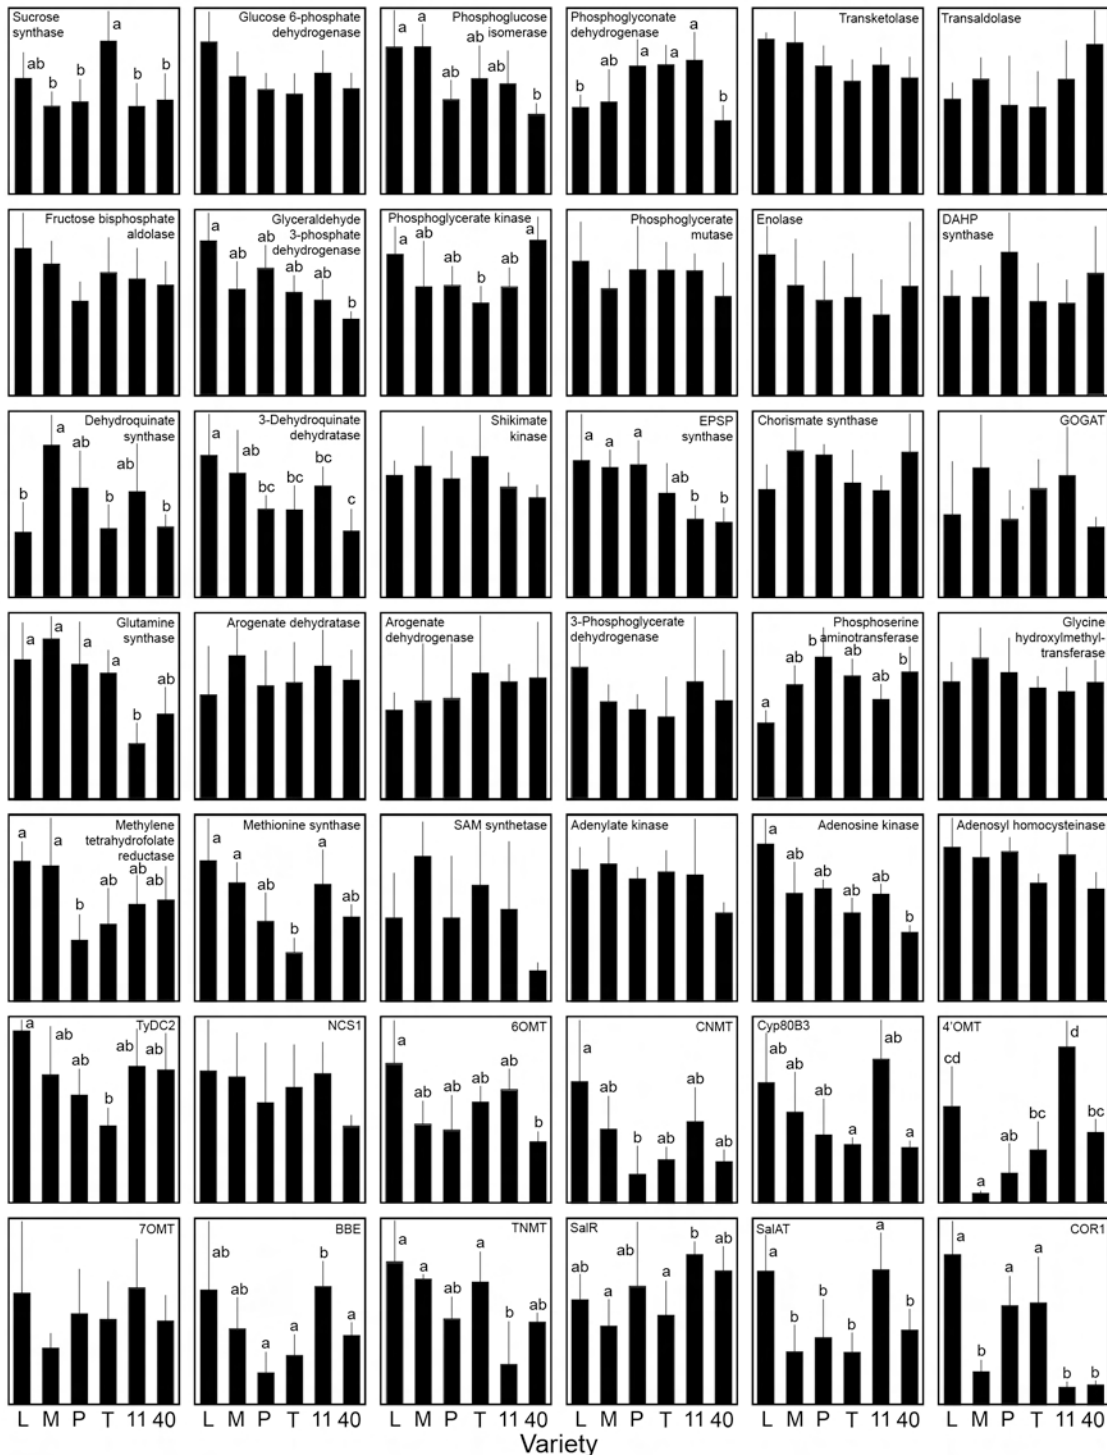

Supplement: pp.108.120493_4.pdf [file pp.108.120493_4.pdf]

Relative abundance

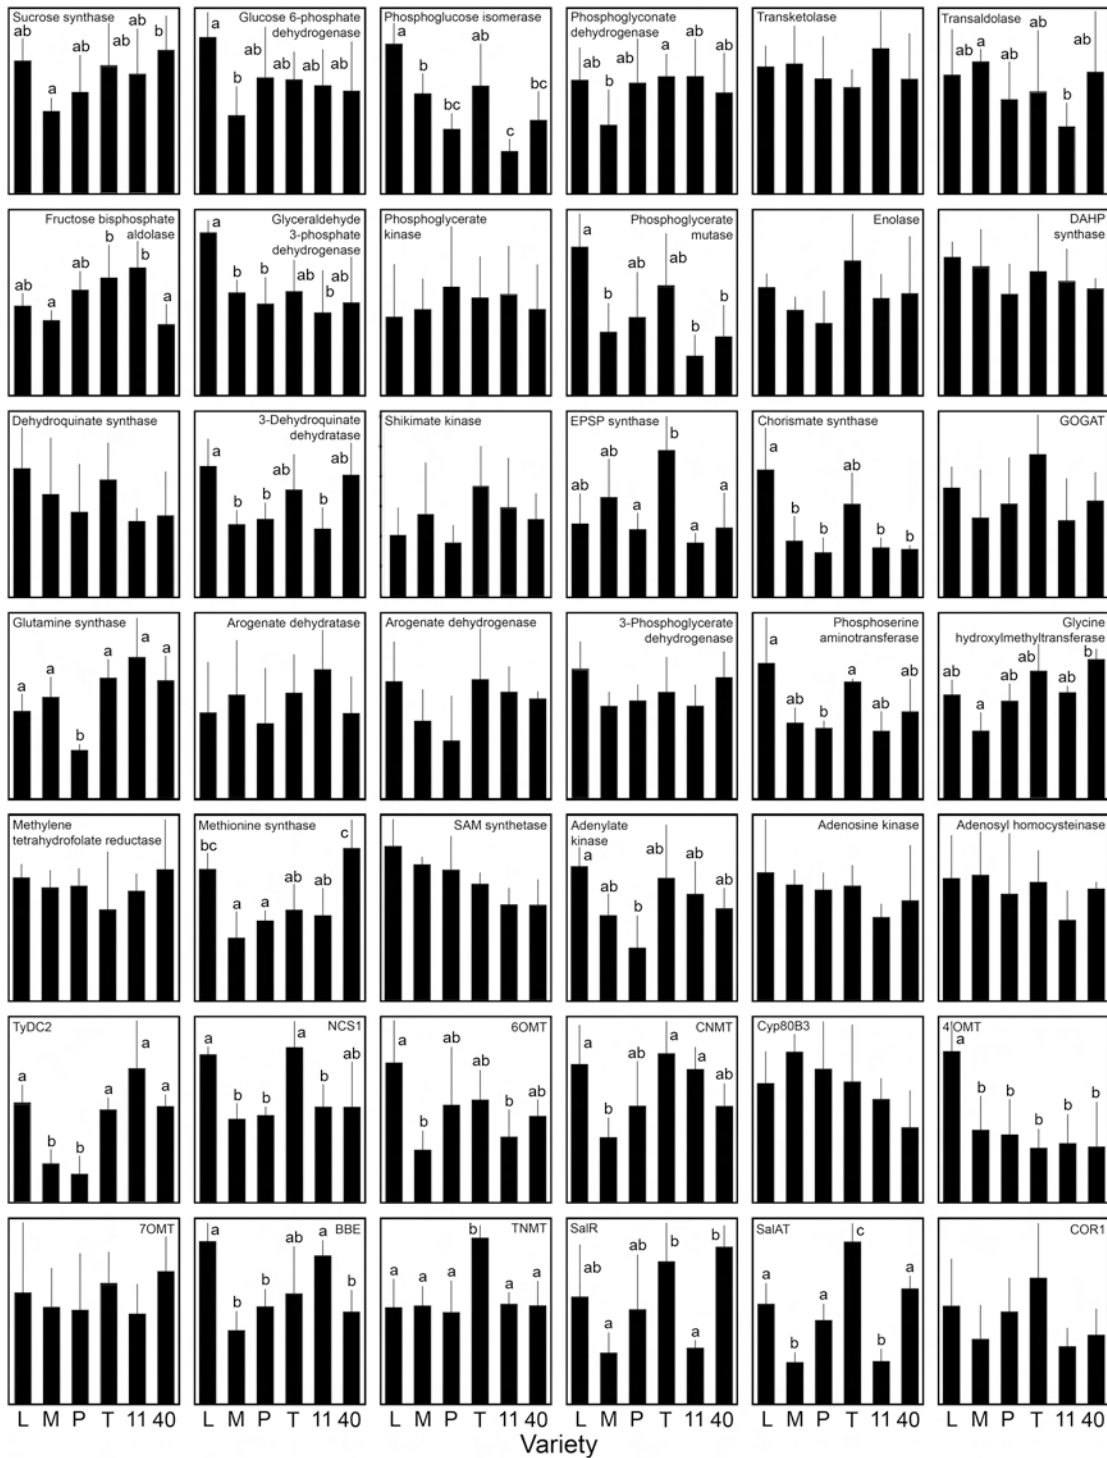

Supplement: pp.108.120493_5.pdf [file pp.108.120493_5.pdf]
